# Supplementary material for: Fungemia by Wickerhamomyces anomalus—A Narrative Review
Source: MDPI journal article supplement (doi:10.3390/pathogens13030269), 2024-03-21
Supplement: s1 [file s1]

Table S1. Characteristics of included studies

| Author and year             | Number of patients | Gender  | Age (years)       | Treatment (%)                                                   | Mortality (%) |
|-----------------------------|--------------------|---------|-------------------|-----------------------------------------------------------------|---------------|
| Baron et al, 1988 [30]      | 1                  | Male    | 34                | Amphotericin B 1 (100)                                          | 0 (0)         |
| Klein et al, 1988 [31]      | 2                  | 2 males | 55, 59            | Amphotericin B 2 (100)                                          | 0 (0)         |
| Muñoz et al, 1989 [32]      | 1                  | Male    | 51                | Amphotericin B 1 (100)                                          | 0 (0)         |
| Salesa et al, 1991 [33]     | 1                  | Male    | 28                | No antifungal 1 (100)                                           | 0 (0)         |
| Neumeister et al, 1992 [34] | 1                  | Male    | 65                | Fluconazole 1 (100)                                             | 1 (100)       |
| Hirasaki et al, 1992 [35]   | 1                  | Male    | 63                | Fluconazole 1 (100)                                             | 0 (0)         |
| Sekhon et al, 1992 [36]     | 1                  | Male    | 0.5               | Amphotericin B 1 (100)<br>5-flucytosine 1 (100)                 | 0 (0)         |
| Yamada et al, 1995 [37]     | 4                  | 4 males | 0.033, 0.33, 2, 8 | Fluconazole 3 (75)<br>Miconazole 1 (25)<br>5-flucytosine 1 (25) | 1 (25)        |
| Kunová et al, 1996 [38]     | 1                  | Female  | 46                | Amphotericin B 1 (100)                                          | 0 (0)         |
| Krcmery et al, 1998 [39]    | 1                  | Female  | NR                | Amphotericin B 1 (100)                                          | 0 (0)         |

|                              |   |                      |                                   |                                                                                                  |          |
|------------------------------|---|----------------------|-----------------------------------|--------------------------------------------------------------------------------------------------|----------|
| Wong et al, 2000<br>[40]     | 1 | Female               | 0                                 | Amphotericin B 1<br>(100)                                                                        | 1 (1000) |
| Kalenic et al, 2001<br>[41]  | 8 | 5 males<br>3 females | 22, 31, 32, 37, 41, 48,<br>58, 61 | Fluconazole 5 (62.5)<br>Miconazole 2 (25)                                                        | 3 (37.5) |
| Bakir et al, 2004<br>[42]    | 5 | 4 males<br>1 female  | 0, 0.92, 1.5, 8, 14               | Amphotericin B 5<br>(100)<br>No antifungal 3<br>(37.5)                                           | 1 (20)   |
| Paula et al, 2006<br>[43]    | 2 | 2 females            | 0, 0                              | Amphotericin B 2<br>(100)<br>Fluconazole 2 (100)<br>5-flucytosine 1 (50)                         | 2 (100)  |
| Krcmery et al, 2009<br>[44]  | 3 | NR                   | 0.08, 0.67, 8                     | Amphotericin B 3<br>(100)                                                                        | 0 (0)    |
| Kalkanci et al, 2010<br>[45] | 4 | NR                   | 0, 0, 0, 0                        | Amphotericin B 3<br>(75)<br>Fluconazole 2 (50)<br>Voriconazole 1 (25)<br>No antifungal 1<br>(25) | 0 (0)    |
| DeHaan et al, 2011<br>[46]   | 1 | Male                 | 70                                | Caspofungin 1<br>(100)                                                                           | 0 (0)    |
| da Silva et al, 2013<br>[27] | 5 | 2 males<br>3 females | 0, 0, 0, 0, 0                     | Amphotericin B 2<br>(40)<br>Fluconazole 5 (100)                                                  | 0 (0)    |

|                                 |    |                      |                                         |                                                                     |          |
|---------------------------------|----|----------------------|-----------------------------------------|---------------------------------------------------------------------|----------|
| Chan et al, 2013 [47]           | 1  | Male                 | 21                                      | Micafungin 1 (100)                                                  | 0 (0)    |
| Lin et al, 2013 [60]            | 6  | 3 males<br>3 females | 0, 0, 0, 0, 0, 0                        | Amphotericin B 6 (100)<br>Fluconazole 1 (16.7)                      | 1 (16.7) |
| Taj-Aldeen et al, 2014 [48]     | 1  | Female               | 1.5                                     | Amphotericin B 1 (100)                                              | 1 (100)  |
| Otağ et al, 2015 [49]           | 2  | 2 females            | 0.14, 1.08                              | Caspofungin 1 (50)<br>No antifungal 1 (50)                          | 1 (50)   |
| Yılmaz-Semerci et al, 2017 [50] | 1  | Male                 | 0.08                                    | Fluconazole 1 (100)                                                 | 0 (0)    |
| Fernández-Ruiz et al, 2017 [51] | 2  | 1 male<br>1 female   | 56, 75                                  | Amphotericin B 1 (50)<br>Fluconazole 2 (100)                        | 0 (0)    |
| Jung et al, 2018 [52]           | 11 | 5 males<br>6 females | 2, 6, 6, 17, 18, 47, 50, 52, 76, 77, 78 | Fluconazole 2 (18.2)<br>Caspofungin 5 (45.5)<br>Micafungin 6 (54.5) | 4 (36.4) |
| Dutra et al, 2020 [53]          | 1  | Female               | 2.16                                    | Amphotericin B 1 (100)<br>Fluconazole 1 (100)                       | 1 (100)  |
| Mehta et al, 2020 [54]          | 1  | Male                 | 36                                      | Fluconazole 1 (100)                                                 | 0 (0)    |
| Cai et al, 2021 [29]            | 2  | 1 male               | 0, 0                                    | Fluconazole 1 (50)                                                  | 0 (0)    |

|                               |    |                        |                                                                                  |                                                                                                                          |          |
|-------------------------------|----|------------------------|----------------------------------------------------------------------------------|--------------------------------------------------------------------------------------------------------------------------|----------|
|                               |    | 1 female               |                                                                                  | NR 1 (50)                                                                                                                |          |
| Zhang et al, 2021 [19]        | 13 | 6 males<br>7 females   | 29, 33, 39, 41, 47, 60, 61, 64, 66, 69, 70, 75, 89                               | Amphotericin B 1 (7.7)<br>Fluconazole 9 (69.2)<br>Voriconazole 3 (23.1)<br>Itraconazole 1 (7.7)<br>No antifungal 1 (7.7) | 5 (38.5) |
| Yang et al, 2021 [26]         | 14 | 8 males<br>6 females   | 0.04, 0.04, 0.04, 0.04, 0.06, 0.06, 0.06, 0.06, 0.07, 0.08, 0.08, 0.1, 0.1, 0.12 | Fluconazole 14 (100)                                                                                                     | 0 (0)    |
| Shubham et al, 2021 [28]      | 2  | 1 male<br>1 female     | 0, 0                                                                             | Amphotericin B 2 (100)                                                                                                   | 0 (0)    |
| Aboutalebian et al, 2023 [55] | 1  | male                   | 5                                                                                | Amphotericin B 1 (100)                                                                                                   | 1 (100)  |
| Sakai et al, 2024 [56]        | 1  | male                   | 84                                                                               | Amphotericin B 1 (100)                                                                                                   | 0 (0)    |
| Thuler et al, 1997 [57]       | 24 | 11 males<br>13 females | 11 (median)                                                                      | Amphotericin B 16 (66.7)<br>No antifungal 8 (33.3)                                                                       | 0 (0)    |
| Pasqualotto et al, 2005 [58]  | 17 | 9 males<br>8 females   | 1.1 (median)                                                                     | Amphotericin B 15 (88.2)                                                                                                 | 7 (41.2) |

|                       |    |                       |               |                           |          |
|-----------------------|----|-----------------------|---------------|---------------------------|----------|
|                       |    |                       |               | No antifungal 2<br>(11.7) |          |
| Kaur et al, 2020 [59] | 27 | 21 males<br>6 females | 0.04 (median) | NR                        | 4 (14.8) |

NR: not reported
